# Supplementary material for: An enzyme cascade-based electrochemical immunoassay using a polydopamine–carbon nanotube nanocomposite for signal amplification
Source: Royal Society of Chemistry journal article supplement (doi:10.1039/c8tb02659a), 2018-01-01
Supplement: c8tb02659a1.pdf [file c8tb02659a1.pdf]

## **Supporting Information**

### **An Enzyme Cascade-based Electrochemical Immunoassay Using Polydopamine-Carbon Nanotube Nanocomposite for Signal Amplification**

Yue Zhang, Deng Pan, Qing Zhou, Jinjin Zhao, Ning Pan, Yuanjian Zhang, Li-xin  
Wang\* and Yanfei Shen\*

Medical School, School of Chemistry and Chemical Engineering, Southeast University,  
Nanjing, Jiangsu 210009, China

\*Email: lxwang@seu.edu.cn (L.W.); Yanfei.Shen@seu.edu.cn (Y.S.)

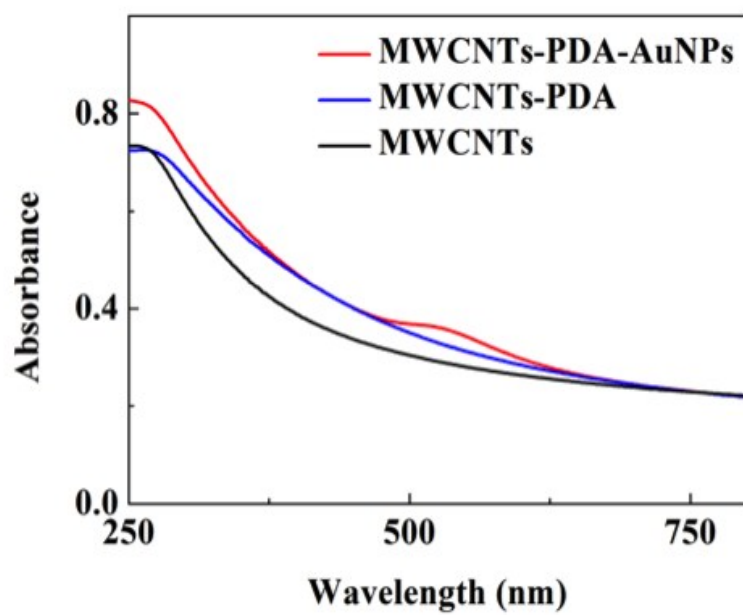

**Fig. S1** UV-vis absorption spectra of MWCNTs, MWCNTs-PDA and MWCNTs-PDA-AuNPs.

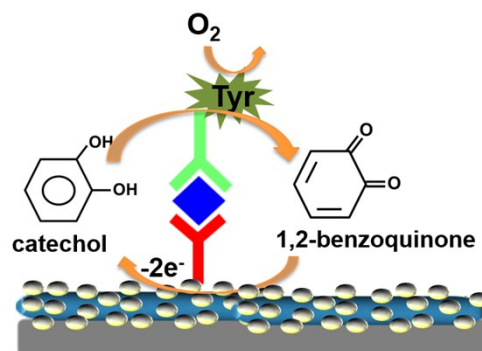

**Fig. S2** Schematic illustration of the electrochemical immunosensor for CEA based on single enzyme by using MWCNTs-PDA-AuNPs nanocomposites for signal amplification.

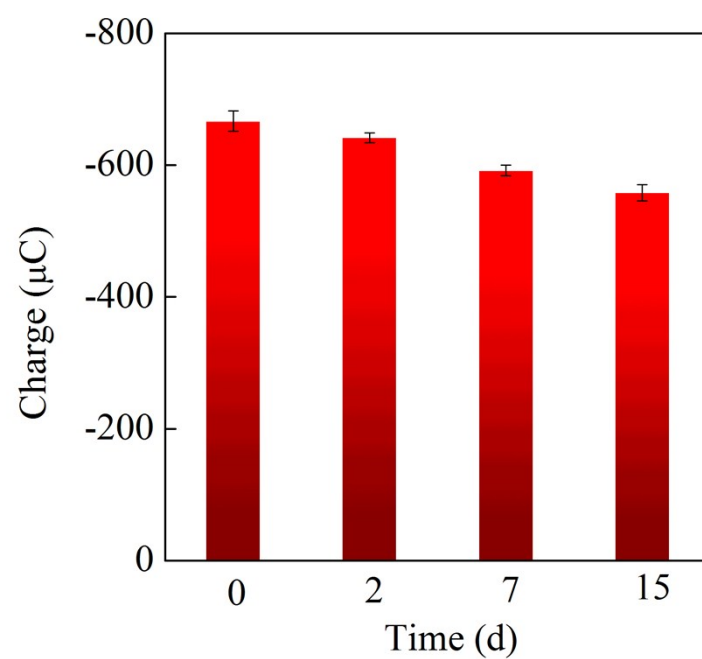

**Fig. S3** Stability of the proposed immunosensor for 0 day, 2 days, 7 days and 15 days, respectively. Error bar = SD (n = 4).
